# Supplementary material for: Growth and Yield Performance of Oyster Mushroom (P. ostreatus (Jacq.: Fr.) Kummer) Using Waste Leaves and Sawdust
Source: Hindawi journal article supplement (doi:10.1155/2023/8013491), 2023-10-04
Supplement: f1 [file 8013491.f1.docx]

Appendices: Photo of fruiting body of Oyster mushroom and effect of different substrates on Growth of Oyster Mushroom

Appendix I.: Photo of fruiting body of Oyster mushroom


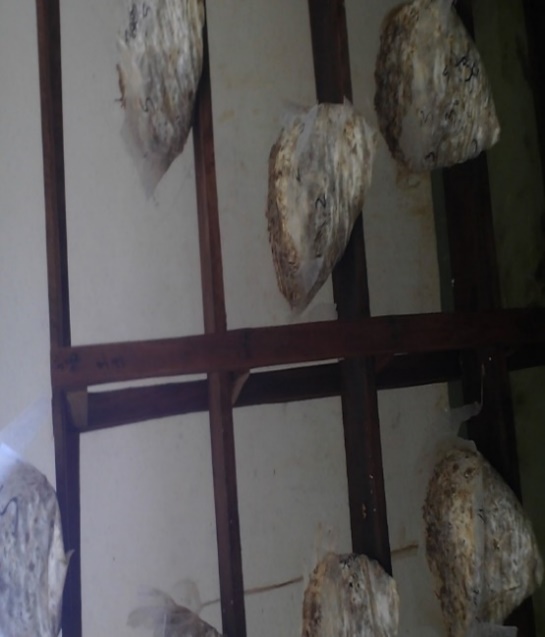


Figure 1. Mycelium running of P.ostreatus in different substrates


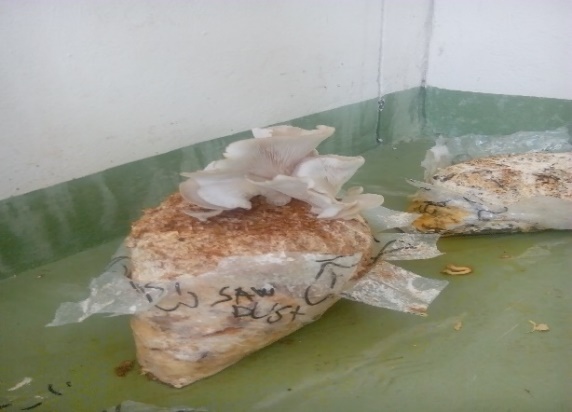


Figure 2. Growth of *P.ostreatus* onsaw dust


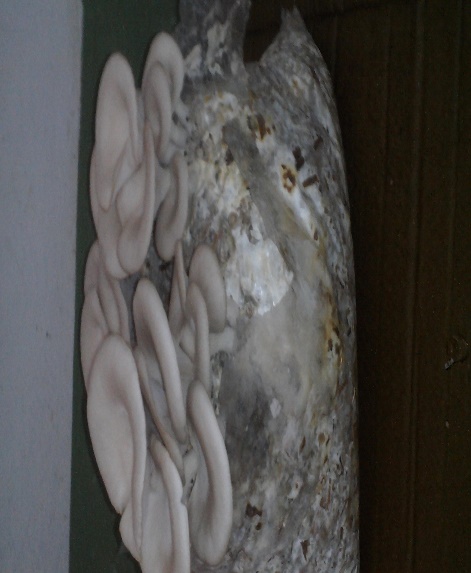


Figure 3. Matured P.ostreatus on Cotton husk


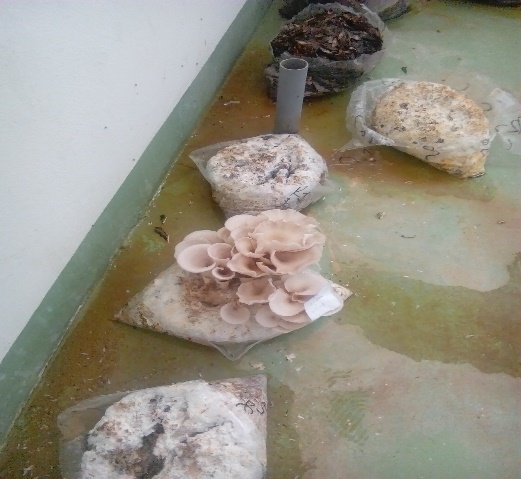

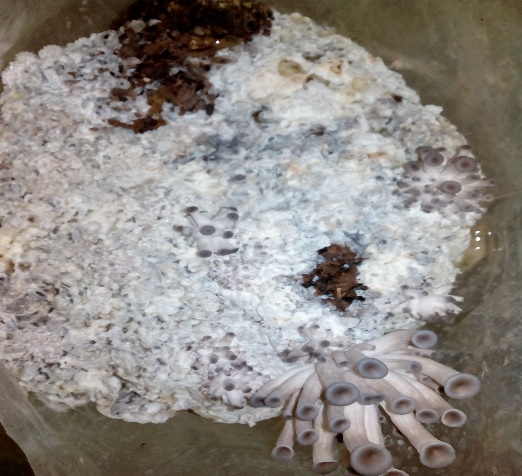


Figure 4. Growth of P.ostreatus on Cordia africana and Euclea racemosa waste leaves

Appendix II.Effect of substrate on growth of *P.ostreatus* across each flush

Figure 5. Effect of substrate on stalk length of P.ostreatus mushroom

Figure 6. Effect of substrate on pileus diameter of P.ostreatus mushroom over flushes

Figure 7. Effect of substrate on pileus thickness of P.ostreatus mushroom over flushes

Figure 8. Effect of substrate on yield of P.ostreatus mushroom over flushes

Figure 9. Effect of substrate on BE of P.ostreatus mushroom over flushes

Figure 10. Effect of substrate on primordial initiation of P.ostreatus mushroom over flushes

Figure 11. Effect of substrate on total primordial of P.ostreatus mushroom over flushes

Figure 12. Effect of substrate on number of effective fruiting bodies of P.ostreatus mushroom over flushes

Figure 13. Effect of substrate on mycelium running.

Figure 14. Effect of substrate on maturity of *P.ostreatus* mushroom over flushes
